# Supplementary material for: Awareness, Motivation, and Fear towards Canine Blood Donation—A Survey of Dog Owners in Lithuania
Source: MDPI journal article supplement (doi:10.3390/ani11113229), 2021-11-12
Supplement: s1 [file s1]

## SURVEY OF DOG OWNERS ABOUT DOG BLOOD DONATION

*Good afternoon,*

*I am Brigita Zakarevičiūtė, a PhD student at the Veterinary Academy of the Lithuanian University of Health Sciences and a veterinary surgeon. I am currently conducting research on the topic of dog blood donation, so I would like to know your opinion on this topic. This questionnaire is anonymous.*

*If you have further questions, you can apply - brigita.zakareviciute@lsmuni.lt*

**PART (A).** In this section, I would like to ask questions about your dog(s). Please mark the correct answer or write down the answer.

A1. How many dogs do you own?

- ☐ one
- ☐ more than one (*continue from question A7*)

A2. What is the breed of your dog? (if you own a mixed breed, please write it down as well)

- ☐ \_\_\_\_\_

A3. What is the age of your dog?

- ☐ \_\_\_\_\_

A4. What gender is your dog?

- ☐ female
- ☐ male

A5. Does your dog currently have health problems?

- ☐ no
- ☐ yes, have minor health problems
- ☐ yes, have serious health problems

A6. Did your dog have ever (currently bred or formerly) needed urgent veterinary care when the life of the animal was in danger? (*please continue from Part B*)

- ☐ yes
- ☐ no

A7. How many dogs do you have?

- ☐ \_\_\_\_\_

A8. What are the breeds? (if you own a mixed breed, please write it down as well)

- ☐ \_\_\_\_\_

A9. What is the age of you dogs (please write down the interval from the youngest to the oldest):

- ☐ \_\_\_\_\_

A10. What are the genders of your dogs?

- ☐ females
- ☐ males
- ☐ females, males

A11. Does any of your dog currently have health problems?

- ☐ no
- ☐ yes, have minor health problems
- ☐ yes, have serious health problems

A12. Did any of your dogs have ever (currently bred or formerly) needed urgent veterinary care when the life of the animal was in danger?

- ☐ yes
- ☐ no

**PART (B).** In this section, I would like to ask you what do you know about dog blood donation in Lithuania. Please mark the correct answer.

B1. Do you know that dog can be a dog blood donor?

- ☐ yes
- ☐ no (*please continue from Part C*)

B2. Have you ever heard (knew) that blood transfusions are performed in dogs in Lithuania?

- ☐ yes
- ☐ no

B3. Do you know what requirement apply for dogs blood donors?

- ☐ yes
- ☐ no

B4. Has your dog been a blood donor?

- ☐ yes
- ☐ no

B5. Has your dog's veterinarian mentioned to you before that your dog is eligible to become a blood donor?

- ☐ yes
- ☐ no
- ☐ I cannot remember

B6. Do you think collecting donor blood from a dog it is a risky procedure for a dog's health?

- ☐ yes
- ☐ no
- ☐ I don't have an opinion

**PART (C).** In this section, I would like to find out what would motivate you, as a dog owner, to participate in a dog blood donation program. Please mark the number from **1 (“doesn’t motivate me at all”) to 5 (“motivates me a lot”).**

|                                                                                                    |   |   |   |   |   |
|----------------------------------------------------------------------------------------------------|---|---|---|---|---|
| I would do a noble task.                                                                           | 1 | 2 | 3 | 4 | 5 |
| My pet and I would save the life of another animal.                                                | 1 | 2 | 3 | 4 | 5 |
| As a canine blood donor, my dog would be given priority for blood transfusion if needed.           | 1 | 2 | 3 | 4 | 5 |
| My dog would get blood tests for free.                                                             | 1 | 2 | 3 | 4 | 5 |
| My dog’s blood type would be determined for free.                                                  | 1 | 2 | 3 | 4 | 5 |
| My dog would get a free check up for tick-borne diseases.                                          | 1 | 2 | 3 | 4 | 5 |
| My dog would get a free vaccination once a year.                                                   | 1 | 2 | 3 | 4 | 5 |
| My dog would receive a souvenir showing that they were a participant in a canine donation program. | 1 | 2 | 3 | 4 | 5 |
| I could be proud of my pet.                                                                        | 1 | 2 | 3 | 4 | 5 |
| I will be able to tell other people about this noble work.                                         | 1 | 2 | 3 | 4 | 5 |
| I could make this noble work public on social networks.                                            | 1 | 2 | 3 | 4 | 5 |
| I could inspire other people for this noble work.                                                  | 1 | 2 | 3 | 4 | 5 |

**PART (D)** If your dog would fit the requirements to become a blood donor, how worried or scared would you be about these statements? Please mark the number from **1 ("doesn't frighten me at all") to 5 ("it frightens me a lot")**.

|                                                                                                                         |   |   |   |   |   |
|-------------------------------------------------------------------------------------------------------------------------|---|---|---|---|---|
| Before the donation procedure, the intravenous sample will be taken from a limb of your dog.                            | 1 | 2 | 3 | 4 | 5 |
| Before the procedure, the temperature of the dog will be measured, and its general clinical condition will be assessed. | 1 | 2 | 3 | 4 | 5 |
| Before the procedure, the dog's fur will be shaved in the neck area.                                                    | 1 | 2 | 3 | 4 | 5 |
| During the procedure, a needle will be inserted into a vein in the neck of the dog and blood will be collected.         | 1 | 2 | 3 | 4 | 5 |
| When collecting blood (about 10 min) the dog will have to sit quietly or lie down on the examination table.             | 1 | 2 | 3 | 4 | 5 |
| Complications are possible during donation (skin irritation, bruising at the blood sampling site, general weakness).    | 1 | 2 | 3 | 4 | 5 |

**PART (E).** In this section, I would like to ask information about you. I remind you that the questionnaire is anonymous and your personal data will not become public or available to anyone - it will only be used to summarize the purposes of this investigation. Please mark the correct answer or write down the answer.

E1. What is your gender?

- ☐ female
- ☐ male

E2. What is your age?:

- ☐ \_\_\_\_\_ y.

E3. Where do you live?:

- ☐ \_\_\_\_\_

E4. What is your educational degree?

- ☐ some high school, no diploma
- ☐ high school graduate
- ☐ professional degree
- ☐ bachelor's degree
- ☐ master's degree
- ☐ other

E5. What is your current social status? (you can mark more than one)

- ☐ high school student
- ☐ student
- ☐ worker
- ☐ unemployed
- ☐ retired
- ☐ other

E6. Are you a blood donor by yourself?

- ☐ yes
- ☐ no, but I would like to
- ☐ no, I wouldn't like that

*Thank you for your time and your answers.*
